1 **Article: Discoveries**

2 **Title: Chiropterans are a hotspot for horizontal transfer of DNA transposons in Mammalia**

3  
4 **Authors:** Nicole S Paulat<sup>1</sup>, Jessica M Storer<sup>2</sup>, Diana D Moreno-Santillán<sup>1</sup>, Austin B Osmanski<sup>1</sup>, Kevin  
5 AM Sullivan<sup>1</sup>, Jenna R Grimshaw<sup>1</sup>, Jennifer Korstian<sup>1</sup>, Michaela Halsey<sup>1</sup>, Carlos J Garcia<sup>1</sup>, Claudia  
6 Crookshanks<sup>1</sup>, Jaquelyn Roberts<sup>1</sup>, Arian FA Smit<sup>2</sup>, Robert Hubley<sup>2</sup>, Jeb Rosen<sup>2</sup>, Emma C Teeling<sup>3</sup>, Sonja  
7 C Vernes<sup>4,5,6</sup>, Eugene Myers<sup>7</sup>, Martin Pippel<sup>8</sup>, Thomas Brown<sup>8</sup>, Michael Hiller<sup>9</sup>, Zoonomia Consortium,  
8 Danny Rojas<sup>10</sup>, Liliana M Dávalos<sup>11,12</sup>, Kerstin Lindblad-Toh<sup>13,14</sup>, Elinor K Karlsson<sup>14,15,16</sup>, David A Ray<sup>1</sup>

9 **Affiliations:**

10 <sup>1</sup>Department of Biological Sciences, Texas Tech University; Lubbock, TX 79409, USA.

11 <sup>2</sup>Institute for Systems Biology; Seattle, WA 98109, USA.

12 <sup>3</sup>School of Biology and Environmental Science, University College Dublin; Belfield, Dublin 4, Ireland

13 <sup>4</sup>Neurogenetics of Vocal Communication Group, Max Planck Institute for Psycholinguistics; 6525 XD,  
14 Nijmegen, The Netherlands.

15 <sup>5</sup>Donders Institute for Brain, Cognition and Behaviour; 6525 AJ, Nijmegen, The Netherlands.

16 <sup>6</sup>School of Biology, The University of St Andrews; Fife KY16 9ST, UK.

17 <sup>8</sup>Max Planck Institute of Molecular Cell Biology and Genetics; 01307, Dresden, Germany.

18 <sup>9</sup>LOEWE Centre for Translational Biodiversity Genomics; 60325, Frankfurt, Germany.

19 <sup>10</sup>Department of Natural Sciences and Mathematics, Pontificia Universidad Javeriana Cali, Valle del  
20 Cauca, Colombia

21 <sup>11</sup>Department of Ecology and Evolution, Stony Brook University; Stony Brook, NY 11790, USA.

22 <sup>12</sup>Consortium for Inter-Disciplinary Environmental Research, Stony Brook University; Stony Brook, NY  
23 11790, USA.

24 <sup>13</sup> Science for Life Laboratory, Department of Medical Biochemistry and Microbiology, Uppsala  
25 University; Uppsala, 751 32, Sweden

26 <sup>14</sup>Broad Institute of MIT and Harvard; Cambridge, MA 02139, USA

27 <sup>15</sup>Program in Bioinformatics and Integrative Biology, UMass Chan Medical School; Worcester, MA  
28 01605, USA

29 <sup>16</sup>Program in Molecular Medicine, UMass Chan Medical School; Worcester, MA 01605, USA

30 \*Corresponding author. Email: david.4.ray@gmail.com

31

32

## 33 **Abstract**

34 Horizontal transfer of transposable elements is an important mechanism contributing to genetic diversity  
35 and innovation. Bats (order Chiroptera) have repeatedly been shown to experience horizontal transfer of  
36 transposable elements at what appears to be a high rate compared to other mammals. We investigated the  
37 occurrence of horizontally transferred DNA transposons involving bats. We found over 200 putative  
38 horizontally transferred elements within bats; sixteen transposons were shared across distantly related  
39 mammalian clades and two other elements were shared with a fish and two lizard species. Our results  
40 indicate that bats are a hotspot for horizontal transfer of DNA transposons. These events broadly coincide  
41 with the diversification of several bat clades, supporting the hypothesis that DNA transposon invasions  
42 have contributed to genetic diversification of bats.

43

## 44 **Introduction**

45 Transposable elements (TEs), DNA fragments that can mobilize within and across genomes, comprise  
46 most horizontally transferred (HT) genetic material in eukaryotes (Wallau, et al. 2012; El Baidouri, et al.  
47 2014). Although viruses are prime candidates as TE vectors (Gilbert, et al. 2010; Thomas, et al. 2010;  
48 Gilbert, et al. 2014; Gilbert, et al. 2016), the exact mechanisms of how TEs are transferred and invade the  
49 germline of eukaryotes are unclear. Nevertheless, horizontal transfer of transposable elements (HTT) into  
50 naïve genomes can allow TEs to successfully invade and propagate before the host can effectively silence  
51 the invaders with anti-TE defenses (Schaack, et al. 2010; Kofler, et al. 2018). Class II elements (DNA  
52 transposons and rolling-circle (RC) elements), particularly Tc-Mariner transposons, are overrepresented  
53 in eukaryote HT events compared to Class I elements (retrotransposons) (Peccoud, et al. 2017; Zhang, et  
54 al. 2020), likely due to differences in mobilization mechanisms allowing easier transmission (Lampe, et  
55 al. 1996; Silva, et al. 2004; Gilbert, et al. 2016; Gilbert and Feschotte 2018; Palazzo, et al. 2019).

56 The activity and repetitive nature of TEs have shaped genome structure and phenotypes in diverse  
57 lineages, by increasing TE copy number, introducing genetic diversity, altering regulatory networks, and  
58 promoting shuffling of exons and by introducing TE domains that can be coopted by the host genome  
59 (Feschotte and Pritham 2007; Feschotte 2008; Cordaux and Batzer 2009; Schaack, et al. 2010;  
60 Casacuberta and González 2013; Thomas, et al. 2014; Grabundzija, et al. 2016; Zhang, et al. 2019;  
61 Cosby, et al. 2021). Yet the magnitude of influence on genome evolution in mammals is unclear, as  
62 previous studies were limited by relatively few mammal genome assemblies and TE datasets. High  
63 sequence similarity among observed DNA transposons and relatively recent divergence of many mammal  
64 lineages make it difficult to parse HTT versus vertical inheritance (Gilbert, et al. 2010; Novick, et al.

65 2010; Zhang, et al. 2020). Recent publication of many genome assemblies from diverse species has  
66 resolved at least one of these problems (Genereux, et al. 2020; Jebb, et al. 2020; Rhie, et al. 2021;  
67 Threlfall and Blaxter 2021), creating an opportunity to determine the extent of HTT.

68 Mammalian genomes are of considerable interest due to their propensity for relatively low TE diversity  
69 compared to most other vertebrates (Furano, et al. 2004; Chalopin, et al. 2015; Sotero-Caio, et al. 2017),  
70 making HTT events more easily identifiable. While typically 20-50% of mammalian genomes are TE-  
71 derived, much of this is from retrotransposons (Chalopin, et al. 2015; Sotero-Caio, et al. 2017); most  
72 mammals have experienced little to no DNA transposon accumulation in the last 40 My (Pace and  
73 Feschotte 2007; Sotero-Caio, et al. 2017). A major exception to this observation is the order Chiroptera,  
74 especially members of the family Vespertilionidae, which are well-known for having unusually diverse  
75 TE repertoires, and experiencing several recent, independent DNA transposon invasions (Pritham and  
76 Feschotte 2007; Ray, et al. 2007; Ray, et al. 2008; Thomas, et al. 2011; Pagán, et al. 2012; Mitra, et al.  
77 2013; Ray, et al. 2015; Platt, et al. 2016). While the impacts of these DNA transposon invasions are not  
78 fully understood, they offer a large pool of genetic variation that may contribute to rapid genome  
79 evolution in bats. Several studies have shown TE-driven exon shuffling and transposase cooption have  
80 impacted bat evolution (Pritham and Feschotte 2007; Thomas, et al. 2014; Grabundzija, et al. 2016;  
81 Cosby, et al. 2021). Indeed, a fair number of DNA-transposon derived genes are found in mammal and  
82 vertebrate lineages with a variety of functions including, but not limited to transcription, chromosome  
83 structure, and immunity (reviewed in Feschotte and Pritham 2007).

84 Bats are the second largest order of mammals ( $n \sim 1426$ ), exhibiting some of the most unique mammalian  
85 phenotypes (e.g., flight, laryngeal echolocation, extended longevity, tolerant immunity) and inhabiting  
86 multiple ecological niches (24). This phenotypic diversity along with their unusual diversity of younger  
87 TEs led us to investigate HT of DNA transposons involving bats. In addition to the broad array of  
88 mammalian genomes from the Zoonomia Project (Genereux, et al. 2020), several bat genome assemblies  
89 have been produced by the Bat1K Project (Teeling, et al. 2018; Jebb, et al. 2020). Combined, this  
90 genomic data includes thirty-seven bat species from 11 families and 28 genera spanning the two major  
91 chiropteran clades, Yinpterochiroptera and Yangochiroptera (Teeling, et al. 2005; Amador, et al. 2018).  
92 We analyzed TE accumulation patterns across Chiroptera and leveraged TE curation data from 251  
93 mammal assemblies to perform a large-scale analysis of recent HT of DNA transposons involving bats.  
94 Our findings highlight TE-based diversity within bats and suggest that, in a radical departure from other  
95 eutherian mammals, Chiroptera is a hotspot for HTT.

96

## 97 Results

### 98 *More Recent, Substantial DNA Transposon Accumulation in Bats*

99 We used a curated *de novo* TE library to annotate TE insertions in 250 eutherian mammalian species,  
100 including 37 bat species (Table S1) (Osmanski, et al. 2022; Christmas, et al. forthcoming). A general  
101 comparison of TE content among mammal assemblies is available elsewhere (Osmanski, et al. 2022).  
102 Rather than recapitulate that work in illustrating general distinctions between bats and non-bats, we chose  
103 eight representative eutherians as our outgroup taxa. Of the eight, four species were selected due to  
104 having the greatest accumulation of young ( $\leq 50$  My) DNA transposons outside of bats: two tenrecs  
105 (*Echinops telfairi* and *Microgale talazaci*, Afrosoricida), and the Eastern mole and the Indochinese shrew  
106 (*Scalopus aquaticus* and *Crocidura indochinensis*, Eulipotyphla). The other four species along with the  
107 eulipotyphlans represent one of the five mammalian orders closely related to Chiroptera within  
108 Laurasiatheria (Foley, et al. 2022): horse (*Equus caballus*, Perissodactyla), cow (*Bos taurus*,  
109 Artiodactyla), pangolin (*Manis javanica*, Philodota), and domestic cat (*Felis catus*, Carnivora).

110 With regard to total TE content, bats generally resemble other mammals, with TEs composing 30-60% of  
111 the genome, with 15-30% from LINE elements, and the rest split among SINE, LTR, and DNA elements  
112 (Fig. 1a). The eight outgroup mammals are similar in proportions of different types of TEs, though the  
113 eulipotyphlans have slightly lower TE content overall, and *Bos taurus* harbors a relatively high proportion  
114 of LINEs (Osmanski, et al. 2022). The latter has been discussed previously and is due to an independent  
115 HT of RTE-like retrotransposons, Bov-B LINEs (Kordis and Gubensek 1998). Such variation in  
116 retrotransposon content is not unexpected among mammals (Sotero-Caio, et al. 2017; Platt, et al. 2018).

117 However, there are several major differences between bats and non-bats. Most notable is the presence of  
118 generally higher total and more recent DNA transposon accumulation (Fig. 1b-d), mostly hAT and Tc-  
119 Mariner transposons, in many of the bat subclades and the obvious presence of substantial accumulation  
120 of RC elements in vespertilionid bats in the last 50 My (Fig. 1b). Substantial RC accumulation is not  
121 observed in yinpterochiropteran bats or outgroup species. Within the DNA transposon categories,  
122 vespertilionid bats also have higher hAT element accumulation than yinpterochiropteran lineages, except  
123 for the bumblebee bat (*Craseonycteris thonglongyai*) and the lesser false vampire bat (*Megaderma lyra*)  
124 (Fig. 1b). In comparison to non-bats, vespertilionid bats and *Craseonycteris thonglongyai* have higher  
125 young DNA transposon accumulation than all outgroup mammals, but the four high DNA TE mammals  
126 have greater amounts of young DNA transposons than most if not all other bats. However, the other four  
127 mammals, have less young DNA transposon accumulation than all bats except pteropodids, and this low  
128 recent accumulation is more representative of eutherian mammals in general (Table S2) (Osmanski, et al.  
129 2022).

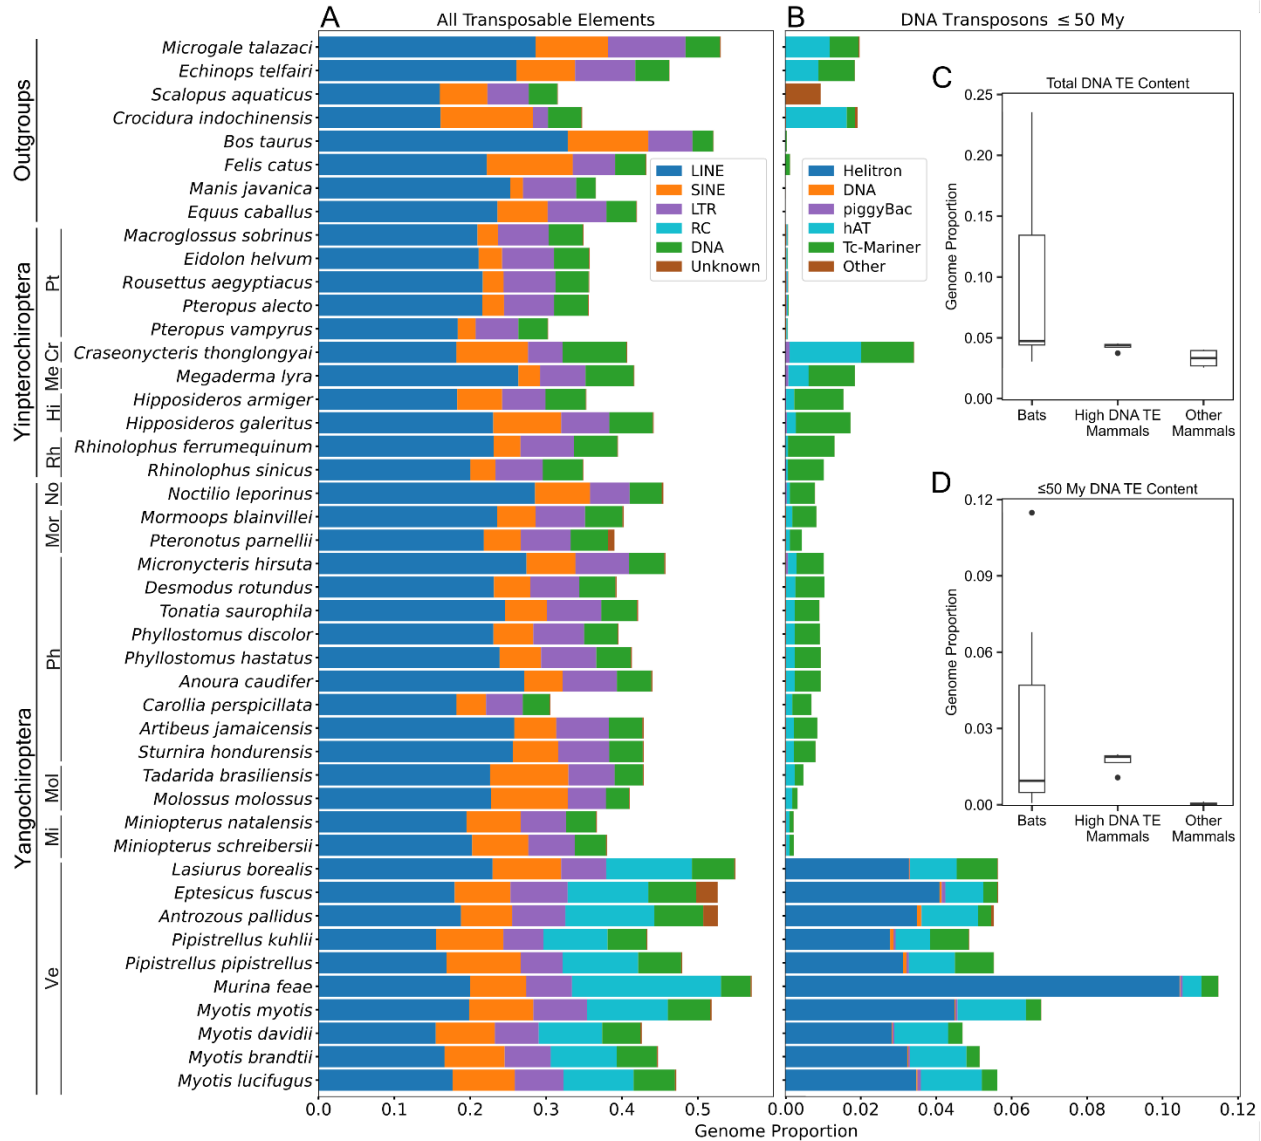

130 **Fig. 1: (A)** Total transposable element accumulation, **(B)** DNA transposon accumulation within the last  
 131 50 My, and **(C and D)** box plots depicting ranges of total DNA transposon genome content in 37  
 132 chiropterans and 8 outgroup mammals. High DNA TE Mammals are defined as described in the main  
 133 text as *Echinops telfairi*, *Microgale talazaci*, *Scalopus aquaticus* and *Crocidura indochinensis*. Bat  
 134 families are indicated by abbreviations left of species names and are as follows: Pt = Pteropodidae, Me =  
 135 Megadermatidae, Cr = Craseonycteridae, Rh = Rhinolophidae, Hi = Hipposideridae, Ve =  
 136 Vespertilionidae, Mi = Miniopteridae, Mol = Molossidae, No = Noctilionidae, Mor = Mormoopidae, Ph =  
 137 Phyllostomidae.

138

### 139 ***Temporal Class II Transposon Accumulation in Bats***

140 To examine the temporal context of TE accumulation, we calculated each TE copy's divergence from the  
141 TE consensus sequence and applied species-specific neutral mutation rates (Table S3) to assign insertion  
142 times to each insertion. To explore temporal variation in Class II accumulation among lineages, we  
143 visualized DNA/RC accumulation within the past ~50 My in Fig. 2. This figure illustrates broad patterns  
144 of DNA transposon superfamily accumulation as it varies by bat family and patterns that are clearly  
145 lineage specific. Each superfamily comprises multiple, potentially lineage-specific subfamilies.

146 For example, vespertilionid bats (Yangochiroptera) show substantial hAT accumulation within the last 40  
147 My, with *Myotis* species showing the highest hAT accumulation between 10-20 Mya, coinciding with  
148 species diverging between 10.9-18.2 Mya (Kumar, et al. 2022), while *Lasiurus borealis* appears to have  
149 experienced a slightly older peak of accumulation 20-35 Mya (Fig. 2a). The two available *Pipistrellus*  
150 species have experienced increased hAT accumulation within the last 5 My, well after the divergence of  
151 the two species ~9.6-17.6 Mya (Kumar, et al. 2022). All vespertilionid bats show Helitron accumulation  
152 across the last 50 My, including ancestral accumulation, but *Murina fcae* displays a surprisingly large  
153 amount, with accumulation peaks ~10 and 40 Mya (Fig. 2d). Across other yangochiropterans,  
154 *Micronycteris hirsuta* stands out as experiencing a burst of piggyBac accumulation not apparent in other  
155 phyllostomids (Fig. 2b), otherwise phyllostomids show consistent patterns of ancestral Tc-Mariner  
156 accumulation 40-50 Mya and little else (Fig. 2). *Noctilio leporinus* shows high Tc-Mariner accumulation  
157 over the span of 25-50 Mya, with little accumulation more recently (Fig. 2c).

158 Yinpterochiropterans display similarly variable Class II accumulation (Fig. 2). Pteropodid bats display a  
159 uniform lack of substantial DNA transposon accumulation within the last 50 My, with little to no  
160 accumulation within the last 10 My (Fig. 2). This is consistent with previous observations of no  
161 substantial retrotransposon accumulation over approximately the same period (Cantrell, et al. 2008;  
162 Nikaido, et al. 2020). Other yinpterochiropterans show peaks of Tc-Mariner accumulation 35-40 Mya,  
163 and low-level accumulation of other DNA transposons. *Craseonycteris thonglongyai* and its closest  
164 relative in this study, *Megaderma lyra*, both have considerably higher piggyBac accumulation, and to a  
165 much lesser extent hAT accumulation than other yinpterochiropterans. However, *C. thonglongyai* also  
166 exhibits a striking increase of species-specific DNA transposon accumulation in the last 5-6 My, with a  
167 second peak of hAT, piggyBac, and Tc-Mariner accumulation (Fig. 2a-c).

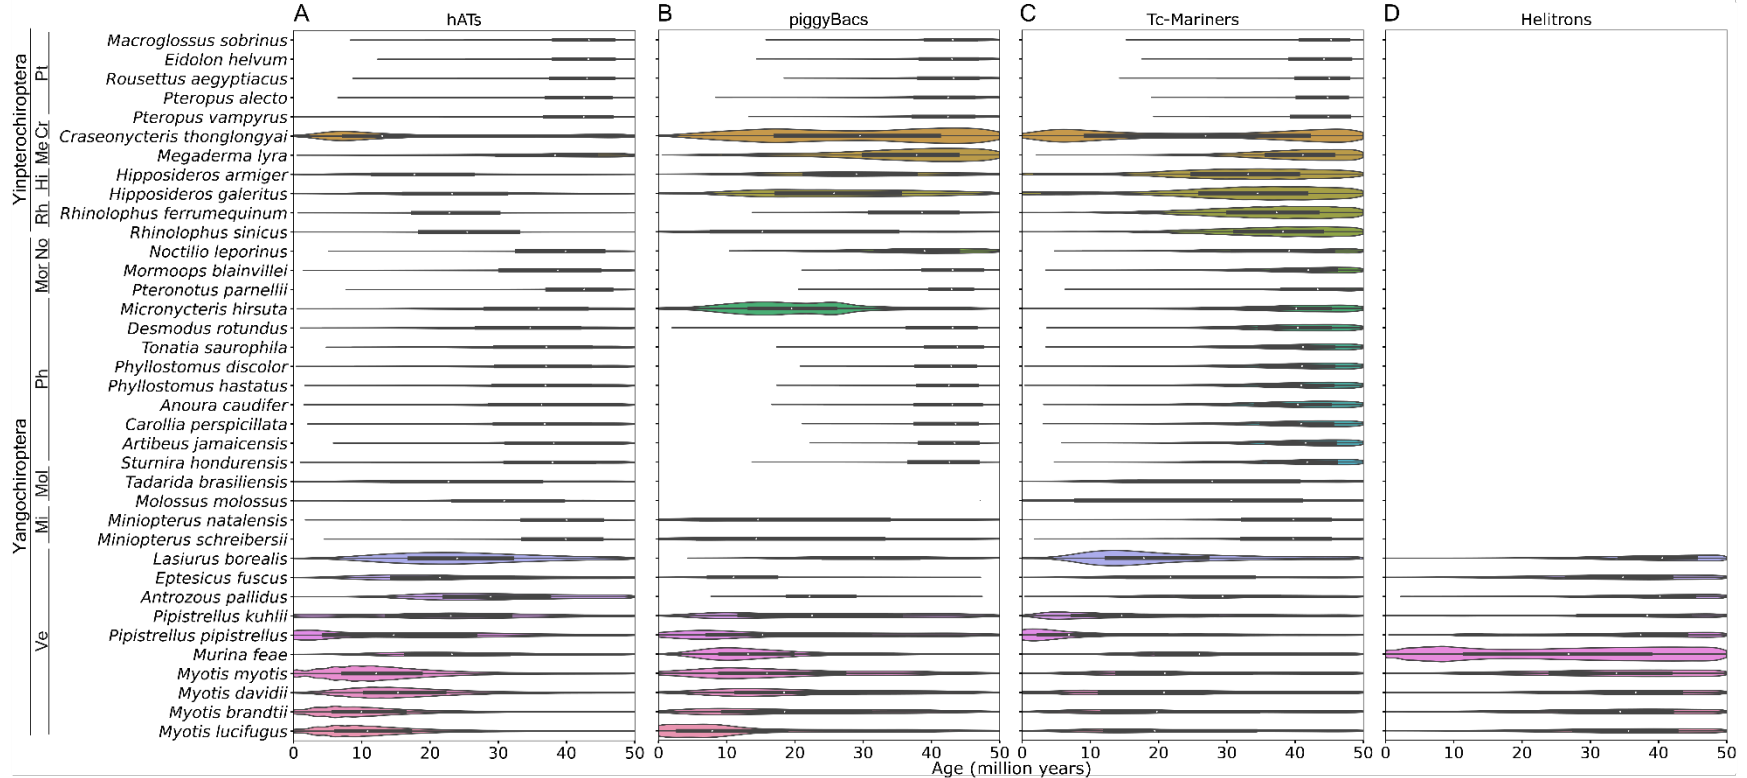

168 **Fig. 2. Violin plots of DNA transposon distributions by family in bats.** Distributions of (A) hAT, (B) piggyBac, (C) Tc-Mariner, and (D)  
 169 Helitron elements within the last 50 million years in 37 bat species. Species are arranged phylogenetically; bat families are indicated by  
 170 abbreviations left of species names and are as follows: Pt = Pteropodidae, Me = Megadermatidae, Cr = Craseonycteridae, Rh = Rhinolophidae, Hi  
 171 = Hipposideridae, Ve = Vespertilionidae, Mi = Miniopteridae, Mol = Molossidae, No = Noctilionidae, Mor = Mormoopidae, Ph = Phyllostomidae.

## 172 ***Many More HT Events in Bats Compared to Other Mammals***

173 Lineage-specific TE subfamilies constitute much of the DNA and RC accumulation across bat lineages in  
174 the last 50 My, an observation consistent with previous studies (Pritham and Feschotte 2007; Ray, et al.  
175 2007; Ray, et al. 2008; Thomas, et al. 2011; Pagán, et al. 2012; Mitra, et al. 2013; Zhuo, et al. 2013; Platt,  
176 et al. 2016). Unlike LINE retrotransposons, which tend to accumulate over long periods and exist as  
177 multiple lineages in genomes, diversifying into sometimes numerous subfamilies (Konkel, et al. 2010;  
178 Boissinot and Sookdeo 2016), DNA transposons are prone to inactivating internal deletions and tend to  
179 have shorter lifespans (Lohe, et al. 1995; Smit 1996; Feschotte and Pritham 2007; Muñoz-López and  
180 García-Pérez 2010; Gilbert and Feschotte 2018). As a result, recent accumulation of a wide variety of  
181 DNA transposons is intriguing and suggests possible external origins.

182 Historically, the criterion used to identify a potential HTT is the presence of a unique TE in a given  
183 genome and the corresponding absence from close relatives. While not always possible, confirming the  
184 presence of a highly similar element in the genome of a distant relative serves as strong confirmation of  
185 the HTT. An example is the presence of a piggyBac transposon, *piggyBac2\_ML*, in the *Myotis lucifugus*  
186 genome, and a highly similar element, *piggyBac2\_Mm*, in the genome of *Microcebus murinus*, a lemur  
187 (Pagan, et al. 2010). The concurrent absence of any similar elements in the genomes of other mammals  
188 strongly suggests horizontal movement from one lineage to the other via some, usually unknown, vector,  
189 such as a virus (Gilbert, et al. 2010; Thomas, et al. 2010; Gilbert, et al. 2014; Gilbert, et al. 2016; Gilbert  
190 and Feschotte 2018).

191 We investigated possible HT of bat DNA transposons across mammals and other eukaryotes using a  
192 broad-scale approach (Materials and Methods). We identified 221 putative HT DNA/RC transposons  
193 representing 229 HT events involving bats (Table S4, S5, S6). Tc-Mariner elements are well-known as  
194 frequent participants in HT (Peccoud, et al. 2017; Reiss, et al. 2019; Zhang, et al. 2020), and as expected,  
195 comprise over a third of putative HT events ( $n = 84$ , 36.7%). Elements from the hAT, piggyBac, and  
196 Helitron families make up the remaining 145 HT events ( $n = 64$ , 29, 52, respectively). BLAST searches  
197 indicated no copies of these putative HTTs in any available eukaryote assembly (other than the  
198 chiropteran assemblies from which it was originally detected) in all but 19 cases (see below). Previous  
199 studies (Wallau, et al. 2012; Melo and Wallau 2020) have also used searches of orthologous insertion  
200 sites in addition to BLAST to confirm patchy TE distributions of putative HTTs. However, the large  
201 number of mammal assemblies and putative HTTs precluded such a large number of additional searches.  
202 We therefore queried two outgroup species with high quality genome assemblies, *Bos taurus* and *Equus*  
203 *caballus*, in detail for orthologous TE copies of the 221 putative HTTs. These searches yielded zero full-



204 length or partial matches. These results along with the lack of BLAST hits are consistent with horizontal  
205 transfer rather than prolonged vertical transmission.

206 Of the nineteen HTTs where a non-chiropteran match was identified by BLAST, sixteen elements  
207 involved other eutherian clades including Lemuriformes (12 TEs), Afrosoricida (6 TEs), Scandentia (1  
208 TE), and Eulipotyphla (1 TE) (Table 1, Table S5, S7). These HTTs included ten hAT elements, five Tc-  
209 Mariner elements and two piggyBac elements. Two HTTs, *Mariner\_Tbel* and *npiggy1\_Mm*, were  
210 previously identified as horizontal transfers involving mammals. *Mariner\_Tbel* was previously found in  
211 the tree shrew *Tupaia belangeri* (Oliveira, et al. 2012), consistent with our findings (Table S5, S7), as  
212 well as the European hedgehog *Erinaceus europaeus*. *npiggy1\_Mm*, a non-autonomous piggyBac element  
213 previously identified as part of an HT event with its autonomous partner *piggyBac1\_Mm* in the lemur  
214 *Microcebus murinus* (Pagan, et al. 2010). Zero orthologous HTT insertions were found between these  
215 mammals and bats indicating independent insertion events consistent with HT. A single autonomous hAT  
216 element, *OposCharlie2*, was found in a marsupial, *Monodelphis domestica*, consistent with previous HT  
217 studies (Gilbert, et al. 2010; Novick, et al. 2010). Only two elements were detected in non-mammals. An  
218 autonomous Tc-Mariner, *Mariner2\_pKuh*, was found in an African reedfish, *Erpetoichthys calabaricus*,  
219 and the bat *Pipistrellus kuhlii* (52 and 327 copies, respectively (Table S7)), but not in the closely related  
220 *Pipistrellus pipistrellus*. This is consistent with the estimated age of the element, ~2.2 My, which is  
221 younger than the divergence of the two pipistrelle species, ~10 to 18 Mya (Kumar, et al. 2022). The  
222 element has high sequence conservation as well, with 99.74% identity between the two species'  
223 consensus sequences (Fig. S1). The second element, a non-autonomous Tc-Mariner, *nMariner1\_Lbo*, was  
224 identified in two lizard species, *Zootoca vivipara* and *Lacerta agilis*, as well as three vespertilionid bats  
225 (Table S7), with sequence conservation of >83% among all species, >90% excluding the single insertion  
226 in *Antrozous pallidus* (Fig. S2). Only five of the nineteen putative HTTs are autonomous. Our methods  
227 assumed that many possible autonomous HTTs have <90 annotated copies in bat genomes, possibly due  
228 to loss or degradation, but that the corresponding HT events are represented by these non-autonomous  
229 counterparts.

230 **Table 1. Summary of putative horizontally transferred DNA transposons present in multiple eukaryote clades.**

| TE Subfamily           | TE Family  | Consensus Length (bp) | Number of Species Involved |          |                 |              |            |              |              |            |
|------------------------|------------|-----------------------|----------------------------|----------|-----------------|--------------|------------|--------------|--------------|------------|
|                        |            |                       | Polypteriformes            | Squamata | Didelphimorphia | Afrosoricida | Scandentia | Lemuriformes | Eulipotyphla | Chiroptera |
| <i>CraTho-1.191</i>    | hAT        | 191                   | 0                          | 0        | 0               | 0            | 0          | 4            | 0            | 5          |
| <i>CraTho-2.327</i>    | hAT        | 213                   | 0                          | 0        | 0               | 1            | 0          | 0            | 0            | 3          |
| <i>EchTel-1.100</i>    | hAT        | 334                   | 0                          | 0        | 0               | 2            | 0          | 0            | 0            | 5          |
| <i>hAT-2N1_MM</i>      | hAT        | 198                   | 0                          | 0        | 0               | 1            | 0          | 4            | 1            | 7          |
| <i>MirCoq-4.2925</i>   | hAT        | 223                   | 0                          | 0        | 0               | 0            | 0          | 3            | 0            | 2          |
| <i>MurFea-1.231</i>    | hAT        | 230                   | 0                          | 0        | 0               | 1            | 0          | 3            | 0            | 2          |
| <i>MyoBra-4.2938</i>   | hAT        | 229                   | 0                          | 0        | 0               | 0            | 0          | 2            | 0            | 4          |
| <i>MyoBra-5.81</i>     | hAT        | 192                   | 0                          | 0        | 0               | 0            | 0          | 4            | 0            | 5          |
| <i>OposCharlie2</i>    | hAT        | 2996                  | 0                          | 0        | 1               | 0            | 0          | 0            | 0            | 2          |
| <i>SPIN_NA_9_Ml</i>    | hAT        | 311                   | 0                          | 0        | 0               | 2            | 0          | 0            | 0            | 5          |
| <i>SPIN_Og</i>         | hAT        | 2836                  | 0                          | 0        | 0               | 2            | 0          | 2            | 0            | 13         |
| <i>npiggy1_Mm</i>      | piggyBac   | 240                   | 0                          | 0        | 0               | 0            | 0          | 2            | 0            | 1          |
| <i>npiggyBac-2_EF</i>  | piggyBac   | 172                   | 0                          | 0        | 0               | 0            | 0          | 2            | 0            | 1          |
| <i>DNA2_pKuh</i>       | Tc-Mariner | 152                   | 0                          | 0        | 0               | 0            | 0          | 1            | 0            | 4          |
| <i>Mariner2_pKuh</i>   | Tc-Mariner | 2292                  | 1                          | 0        | 0               | 0            | 0          | 0            | 0            | 1          |
| <i>Mariner3_pKuh</i>   | Tc-Mariner | 2282                  | 0                          | 0        | 0               | 0            | 0          | 1            | 0            | 2          |
| <i>Mariner_Tbel</i>    | Tc-Mariner | 1283                  | 0                          | 0        | 0               | 0            | 2          | 0            | 0            | 3          |
| <i>nMar1_Rf</i>        | Tc-Mariner | 236                   | 0                          | 0        | 0               | 0            | 0          | 2            | 0            | 6          |
| <i>nMariner1_Lbo</i>   | Tc-Mariner | 184                   | 0                          | 2        | 0               | 0            | 0          | 0            | 0            | 3          |
| Total # Unique Species |            |                       | 1                          | 2        | 1               | 2            | 2          | 5            | 1            | 18         |

232 In contrast to the 229 HT events in bats, few possible HT events were identified in other mammals  
233 (detailed above and in Christmas et al. (forthcoming)). Of the six other orders with HT events, only  
234 Primates and Afrosoricida had more than five events (15 and 6, respectively). To compare HT events  
235 between the 37 bats and 213 other eutherian mammal species, we modeled the number of events by  
236 mammalian order (Table S8) using a negative binomial distribution and estimated HT means for both bats  
237 and non-bats. Although bats represent only one mammalian order, this point observation can be compared  
238 to the posterior distribution of the mean of HT events across eighteen other orders (equivalent to a one  
239 sample t-test for normal data). As there is only a single order to estimate the mean for bats, posterior  
240 distribution of these estimates overlap (Fig. 3). However, considering there is only a single point estimate  
241 of HT for bats, it does not overlap with the posterior mean of HT for all other mammalian orders. This  
242 demonstrates that there were many more HT events in bats than in other mammalian orders.

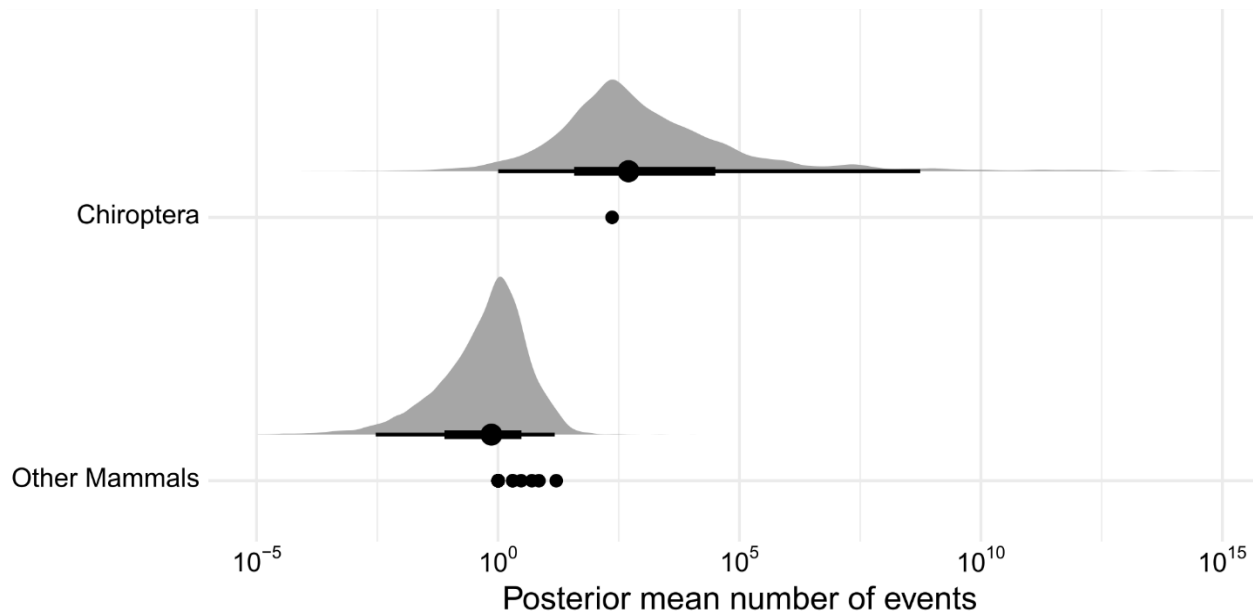

243 **Fig. 3. Posterior distributions of group category (bats vs. non-bat eutherian mammals) on**  
244 **horizontal TE transfer counts.** A constant of 1 was added to HTT counts for plotting to show the wide  
245 range of posterior estimates, which spans many orders of magnitude. For each coefficient: black dots  
246 show median, thin lines show the 95% posterior probability, thick lines show the 66% posterior  
247 probability, and gray shows the posterior density of the estimates. Black dots show the observations on  
248 which the models were based.

### 249 *Varying HT Patterns and Rates in Chiroptera*

251 We explored large scale patterns of HT within bats by mapping the 229 putative HT events onto a bat  
252 phylogeny based on the presence/absence patterns of each element and its estimated average age (Fig. 4,  
253 Table S6). As expected, there were far more putative HT events in yangochiropterans than in

254 yinpterochiropteran lineages (170 and 59, respectively) but the distribution is exceptionally uneven within  
255 each clade. More than a third of all HT in Yinpterochiroptera are unique to *Craseonycteris thonglongyai*,  
256 with only two relatively ancient examples occurring in Pteropodidae. Similarly, within Yangochiroptera a  
257 large majority ( $n = 134$ , 78.8%) of HT events involve only vespertilionid bats. Interestingly, 8 different  
258 elements appear to have independently invaded both Vespertilionidae and either *C. thonglongyai* or the  
259 Rhinolophoidea ancestral branch (Table S5, S6), though it is unclear if these represent initial HT into one  
260 bat clade followed by HT between bats, a pair of independent HT from outside Chiroptera into different  
261 bat clades, or some combination thereof. Searches for orthologous insertions of the eight HTTs among  
262 representative species (*Hipposideros galeritus*, *C. thonglongyai*, *Myotis myotis*, and *Pipistrellus*  
263 *pipistrellus*), yielded zero matching orthologous insertions.

264 We then calculated HT event rates for bat lineages. Yangochiropterans had almost double the average HT  
265 rate of yinpterochiropterans, with a rate of 0.277 versus 0.146 putative HT/My, respectively (Table S9).  
266 However, we found a broad range of HT rates within both groups. Within Yinpterochiroptera, rates  
267 ranged from 0.023 for *Megaderma lyra* to 0.512 for *C. thonglongyai*. The ancestral branch for  
268 Hipposideridae and Rhinolophidae had the second-highest rate at 0.244. Within Yangochiroptera, rates  
269 varied between 0.022 at the ancestral branch for Miniopteridae and Vespertilionidae and 1.593 at the  
270 ancestral branch for the four *Myotis* species, which was also the highest HT rate within examined  
271 lineages. The second-highest rate within Yangochiroptera was in the ancestral Vespertilionidae branch, at  
272 1.215 (Table S9).

273 Within bats, Hipposideridae, Rhinolophidae, and Vespertilionidae are among the most species rich clades  
274 while also exhibiting some of the highest TE diversity. This raises the question of a relationship between  
275 species richness and HT events. The relationship between species diversity and HT events was indeed  
276 stronger than for mammals more generally (Fig. 1). However, the relationship between species richness  
277 and HT events, despite considerable variation across TE types, proved to be statistically unsupported (Fig.  
278 S4, Table S11) but intriguing. This was also the case for only young TE counts (Fig. S5, Table S12). By  
279 increasing statistical power, additional data has the potential to influence future understanding of this  
280 relationship.

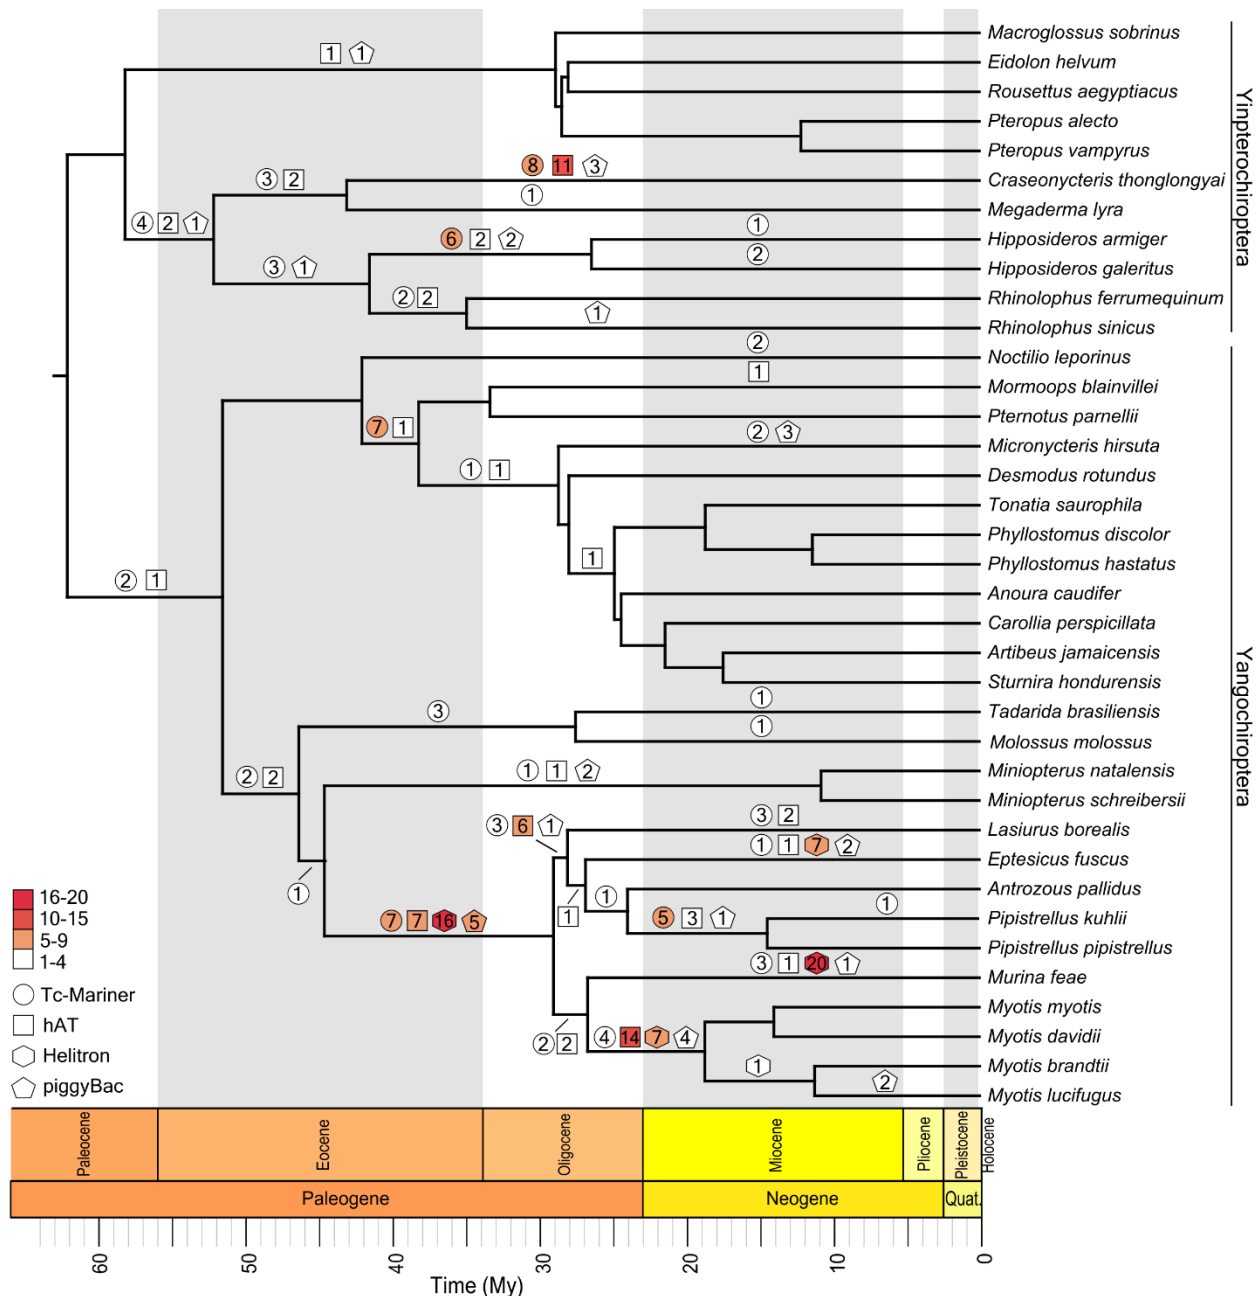

281 **Fig. 4. Horizontal transfer of DNA transposons within Chiroptera.** Inferred horizontal transfer (HT)  
 282 events of 221 unique transposable elements from Tc-Mariner (circle), hAT (square), Helitron (hexagon),  
 283 or piggyBac (pentagon) families are labelled on corresponding branches. Shape color indicates numerical  
 284 range of putative HT events on a given branch: white = 1-4 elements, pink = 5-9, red = 10-15, dark red =  
 285 16-20; number of events included within each marker. Phylogeny is scaled by estimated divergence times  
 286 in millions of years (My). HT event branch assignment inferred from presence/absence patterns and the  
 287 element's average age. Phylogenetic relationships are based on Foley et al. (2022) and Amador et al.  
 288 (2018); estimated lineage divergence times (Table S10) taken from TimeTree (Kumar, et al. 2022).

289

## 290 **Discussion**

291 Our results, in combination with those of Christmas et al. (forthcoming), indicate that bats are a hotspot  
292 for horizontal transfer of DNA transposons within mammals. This was a broad-scale, computational  
293 approach to identify HTT and we used several conservative search thresholds that excluded candidate HT  
294 DNA transposons with low copy number (<90 annotated insertions) in bats, such as *Helibat1* and  
295 *SPIN\_M1*, both previously identified as HTT with limited distributions (Pace, et al. 2008; Thomas, et al.  
296 2011). We also excluded many highly similar elements to avoid inflation from vertically diversifying  
297 elements, including highly similar deletion products. This could have yielded false negatives in both our  
298 mammalian targets and other eukaryotes. Further research into potential vectors such as eukaryotic  
299 parasites and viruses will require less conservative methods to detect low copy or fragmented elements.  
300 Despite these limitations, we found several hundred HT events, which likely are an underrepresentation of  
301 the number of HT events that have occurred within Chiroptera, particularly as HT is more likely than  
302 vertical persistence of DNA transposons (reviewed in Feschotte and Pritham 2007; Wells and Feschotte  
303 2020). In comparison to other mammals, bats have far more HT events, and substantially higher recent  
304 DNA transposon accumulation, even when compared to mammals known to have experienced HTT, such  
305 as *Otolemur garnettii*, *Microcebus murinus*, or *Echinops telfairi* (Fig. 1, Fig. 3, Table S2, Table S8).  
306 While our searches did identify four species with higher than the mammalian average recent DNA  
307 transposon accumulation, these instances are clearly exceptions among non-bat eutherians and not the  
308 rule.

309 To better clarify the distributions and impacts of these HT events, more even sampling across bat lineages  
310 is required, particularly within large species complexes. For example, the genus *Rhinolophus* consists of  
311 ~100 species divided among 15 species groups (Csorba, et al. 2003; Stoffberg, et al. 2010; Demos, et al.  
312 2019), but was represented by only two genome assemblies. Since most genera are only represented by a  
313 single species, it should be noted that HT events mapped to terminal branches may represent HTs into a  
314 common ancestor of multiple species rather than our representative terminal species. That said,  
315 underrepresentation within genera would not explain the numerous lineage specific HTs of *C.*  
316 *thonglongyai* (26), which is a monotypic genus.

317 Consistent with the TE-Thrust hypothesis, most inferred HT events in Fig. 4 map to families or genera  
318 that have undergone rapid diversification. Owing to their potential for genomic innovation, TE  
319 expansions in a genome represent an opportunity for those genomes to gain variation that could lead to  
320 adaptive opportunities (Oliver and Greene 2011, 2012), giving rise to the TE-Thrust hypothesis. HT  
321 events are concentrated at the base of *Hipposideros* and *Rhinolophus* (Foley, et al. 2015), which have 90

322 and 106 recognized species, respectively, and Vespertilionidae (Lack and Van Den Bussche 2010), which  
323 currently consists of 512 species, and basal lineages within it, such as genus *Myotis*, which comprises 131  
324 species (Simmons and Cirranello 2020, accessed 4 September 2021). Thus, intermittent HT and  
325 subsequent bursts of TE amplification correspond to diversification of several large clades across  
326 Chiroptera. The TE-thrust hypothesis also proposes a ‘Goldilocks Zone’ of TEs and evolutionary  
327 potential: too little TE activity results in evolutionary stasis, too much would cause detrimental genomic  
328 instability, but moderate amounts of TE activity and accumulation can allow genomic dynamism and  
329 potentially rapid lineage evolution and diversification (Oliver and Greene 2011, 2012). The data we  
330 present is consistent with these predictions. Some bat lineages, having experienced an influx of highly  
331 successful DNA transposons, may have exploited the increased genomic diversity to aid their expansion  
332 into multiple niches. Alternatively, higher species richness could lead to more HT events due to increased  
333 ecological interactions with potential HT sources and/or vectors, which could synergize with initial HT-  
334 driven diversification. Or environmental heterogeneity may promote speciation and HT, without HT  
335 directly impacting species diversification. This seems less likely given documented Helitron capture of  
336 host promoters and exons in *Myotis* (Thomas, et al. 2014). Helitron-driven tissue-specific nuclear gene  
337 transcription was shown in *Myotis brandtii* (Grabundzija, et al. 2016), and Cosby et al. (2021) identified  
338 numerous DNA transposase-gene fusions with broad gene regulatory functions that vary across bat  
339 clades, including two fusion genes specific to vespertilionids. However, we did not find statistical support  
340 for associations between horizontally transferred elements and descendent species richness, or young  
341 ( $\leq 50$  My) TE accumulation and species richness, likely due to the few bat species sampled and the high  
342 variance of species richness represented by each of our focal taxa. We plan to address this in the future as  
343 additional high-quality genome assemblies are released and statistical power is increased.

344 While we do not know why bats are hotspots for HT, HT-associated TE diversity and accumulation, our  
345 results may indicate a higher tolerance for TE activity in bats. Possible factors influencing this presumed  
346 tolerance could include adaptations in DNA repair pathways and expression (Seim, et al. 2013; Zhang, et  
347 al. 2013; Foley, et al. 2018; Huang, et al. 2019) allowing higher TE loads. Tolerance may also have been  
348 influenced by the potential adaptations in bat immune responses that allow them to experience low viral  
349 loads but many circulating viruses with little apparent negative effects and rapid viral spreading in hosts  
350 (Subudhi, et al. 2019; Brook, et al. 2020; Jebb, et al. 2020; Irving, et al. 2021; Moreno Santillán, et al.  
351 2021). As viruses are likely candidates for transferring TEs (Gilbert, et al. 2010; Thomas, et al. 2010;  
352 Gilbert, et al. 2014; Gilbert, et al. 2016; Gilbert and Feschotte 2018), variability within and across bat  
353 lineages in these immune-related gene expansions and losses (Moreno Santillán, et al. 2021), diversity of  
354 viruses present (Jebb, et al. 2020), as well as impacts of variable geographic proximity (Peccoud, et al.

355 2017) may help explain the higher frequency of HTT in chiropterans and variability of HT success across  
356 bat lineages.

357 Differential bat ecology may also represent part of the answer. Previous studies have implicated blood  
358 feeding arthropods such as *Rhodnius prolixus*, an insect vector of Chagas disease, as a vector for HT  
359 (Gilbert, et al. 2010; Matthews, et al. 2011). Herbivorous bats have significantly less recent DNA  
360 transposon accumulation than carnivorous species (Osmanski, et al. 2022). These observations suggest  
361 insectivorous species may be more susceptible to HT than species with other dietary habits. And indeed,  
362 the clade of bats exhibiting the highest rate of putative HT in our study is the family Vespertilionidae,  
363 which is almost exclusively insectivorous (Nowak 1999; Fenton and Bogdanowicz 2002; Morales, et al.  
364 2019). *C. thonglongyai*, rhinolophids, and hipposiderids are also insectivorous (Arbour, et al. 2019; Pavey  
365 2021) and stand out as exceptional genomic habitats for HT of DNA transposons. Yet despite their  
366 openness to HT, only a handful of types have been successful and with the emphatic exception of  
367 Helitrons in vespertilionids, bats do not seem to have much more diversity in DNA transposons compared  
368 to other eutherians. Why this is the case is still unclear.

369 The potential impacts of these HTT on bat genome evolution cannot be understated. TEs generally are a  
370 potent source of genomic variation that can impact genes and genome structure in numerous ways  
371 (Schaack, et al. 2010; Oliver and Greene 2012; Casacuberta and González 2013; Gilbert and Feschotte  
372 2018). Studies in other mammals have shown low conservation of regulatory sites, and TEs play critical  
373 roles in restructuring regulatory networks by contributing lineage-specific transcription factor binding  
374 sites and regulatory elements (Wang, et al. 2007; Kunarso, et al. 2010; Schmidt, et al. 2012; Chuong, et  
375 al. 2013; Jacques, et al. 2013; Sundaram, et al. 2014; Notwell, et al. 2015; Trizzino, et al. 2017; Judd, et  
376 al. 2021). DNA transposons are no exception. Previous work has shown Helitron-mediated exon and  
377 promoter shuffling and substantial genome inflation within bats (Thomas, et al. 2014), as well as  
378 transposon cooption events resulting in gene fusion and changes in gene network regulation (Cosby, et al.  
379 2021). DNA transposons are well suited to exaptation into transcription factors, as their encoded  
380 transposase proteins, a DNA binding domain and a catalytic nuclease domain, can be domesticated or  
381 repurposed for host cellular functions (Feschotte and Pritham 2007). Known host-transposase fusion  
382 genes include *GTF2IRD2* in placental mammals (Tipney, et al. 2004), *SETMAR* and *CSB-PGBD3* in  
383 primates (Cordaux, et al. 2006; Newman, et al. 2008), and *KRABINER* in Vespertilionid bats (Cosby, et  
384 al. 2021).

385 We note that a weakness of our study is the identification of only a few potential donor/recipient  
386 relationships to the species level. This, however, is to be expected given the paucity of animal genome  
387 assemblies available to search. Only several thousand animal genomes are available of the ~7.8 million



388 animal species currently estimated to exist (Mora, et al. 2011). Thus, while determining the likely HT  
389 partner in any given HT event would be ideal, doing so in all cases is difficult. We point out that, given  
390 our current understanding of evolutionary processes, the sudden appearance of multiple intact sequences  
391 with the hallmarks of DNA transposons in a lineage is likely the result of HT.

392 The observations presented here suggest that HTT events involving Class II transposable elements  
393 contribute to bat genomic diversity to a degree not found in other mammals. The cause of this propensity  
394 toward DNA transposon invasion is currently a mystery but future investigations may reveal the genomic  
395 characteristics that make one species more or less likely to be a safe harbor for horizontally transferred  
396 TEs. Regardless of the reasons and mechanisms behind the multiple invasions, the correspondence  
397 between high rates of HTT events and species radiations in several large bat clades suggests that HTT  
398 activity facilitates genomic innovation and taxonomic diversity. Our results shed new light on the extent  
399 of HTT in bats, but not the impacts of each example or lineage. More research is needed to clarify the  
400 specific roles that these TE expansions have played in bat diversification and genome evolution.

401

## 402 **Materials and Methods**

### 403 ***1.1 Taxon Selection***

404 We examined 37 bat genome assemblies and 214 other eutherian mammal assemblies for this work  
405 (Table S1). These included assemblies from the Zoonomia sequencing effort (Genereux, et al. 2020),  
406 publically available assemblies, and from other sources such as the Bat1k consortium (Jebb, et al. 2019;  
407 Wang, et al. 2020; Moreno Santillán, et al. 2021). In cases where species were represented by individuals  
408 in the Zoonomia project, but the assemblies generated by other efforts were of higher quality, we replaced  
409 the Zoonomia assemblies with the alternates (Table S13). We used a combination of PacBio, Bionano,  
410 HiC, and Illumina sequencing to generate high quality assemblies for *Eptesicus fuscus* and *Antrozous*  
411 *pallidus* (see Supplemental Methods).

### 412 ***1.2 Annotation of Mammalian Transposable Element Insertions***

413 We used the curated *de novo* transposable element (TE) consensus sequence library described in  
414 Osmanski et al. (2022) to annotate TE insertions in all selected species using RepeatMasker v4.1.2-p1  
415 (Smit, et al. 2013-2015) with the RMBlast search engine. Output was processed using RM2Bed.py, a  
416 utility in the RepeatMasker package, with TE insertion overlap resolution by lower divergence values (-o  
417 lower\_div). TE insertion accumulation and temporal distributions were visualized using matplotlib  
418 (Hunter 2007) in Python v3.7.6. We estimated individual TE insertion ages by calculating species-specific  
419 neutral mutation rates for all lineages within the last ~50 My using pairwise branch lengths from Foley et

420 al. (2022) and median divergence times for each species versus an outgroup mammal taxon from  
421 TimeTree (Kumar, et al. 2022). We then evaluated the TE content of the 213 non-bat eutherian mammals  
422 and selected the four species with the highest recent DNA transposon accumulation to compare to bats, as  
423 well as four other species representing eutherian orders closely related to Chiroptera. Annotations for  
424 rolling-circle elements (Helitrons) in bat species outside of Vespertilionidae were excluded from these  
425 visualizations, as these are known to be false positives, as discussed in Osmanski et al. (2022).

## 426 ***2.1 Identification of Putative Horizontally Transferred Class II TEs Involving Chiroptera and Other*** 427 ***Mammals***

428 We selected DNA/RC elements with  $\geq 90$  annotated copies in at least one bat species as our initial set of  
429 HT candidates. We then used the library consensus sequences (107) of this initial TE set as queries in  
430 BLAST searches utilizing what we refer to as the 90-90-90 rule (described below), a more conservative  
431 version of the 80-80-80 rule developed by Wicker et al. (Wicker, et al. 2007). We searched for TE copies  
432 meeting our conservative criteria of present in the genome assemblies of one or more bat species. To  
433 identify any additional eukaryote involvement, we performed BLAST searches of these elements across  
434 all available eukaryote genome assemblies in the NCBI databases.

435 Putative horizontally transferred transposable elements (HTT) were defined as TE insertions annotated in  
436 an assembly with  $< 90$  insertions called in closely related species. We narrowed our search for HTT to  
437 DNA transposon and rolling-circle transposons with  $\geq 90$  copies annotated by RepeatMasker in one or  
438 more bat species. We then used the same TE consensus sequences as queries for blastn searches  
439 (BLAST+ v2.11.0 (Camacho, et al. 2009)) in said bat genomes and implemented the 90-90-90 rule to  
440 identify potential HTTs. The criteria of the 90-90-90 rule are 1) the element must be  $\geq 90$  bp in length, 2)  
441 share  $\geq 90\%$  sequence identity with one another, and 3) have a total ungapped length matching  $\geq 90\%$  of  
442 the consensus sequence. To further exclude potentially erroneous hits from similar elements harboring  
443 short insertions, the element copies must have been  $\leq 10\%$  longer than the query consensus sequence  
444 length. We also excluded potential duplicate elements or vertically diversifying elements with  $\leq 5\%$   
445 sequence divergence using the cross\_match utility of Phrap v0.990319 (Gordon 2003). Similarly, to  
446 account for and exclude DNA transposon deletion products, we used the same query consensus sequences  
447 as before to perform a modified CD-HIT (Storer, Hubley, Rosen and Smit 2021) search for candidate  
448 HTT sequences that cluster together. This search performs two successive cd-hit searches. The first  
449 clusters elements  $\geq 90\%$  identical, the second search adds elements  $> 80\%$  similar to existing clusters or  
450 generates new ones. Elements that clustered together and had overlapping presence/absence patterns  
451 across bat species were collapsed into a single presumed HT event.

452 We then performed a final manual curation by comparing alignments of candidate HTT consensus  
453 sequences to all other elements in the TE consensus library from section 1.2 to identify any deletion  
454 products that were not identified in the previous clustering step. To estimate the age of each TE insertion  
455 within a species, we calculated modified Kimura two-parameter (K2P) distances for each TE copy  
456 compared to the library consensus sequence using RepeatMasker's alignAndCallConsensus and Linup  
457 utilities (Smit, et al. 2013-2015). We then mapped the HT events onto a phylogenetic tree of our 37 bat  
458 species based on the presence/absence pattern of the putative HT elements from our filtered blastn results  
459 and their average ages. TE ages were calculated per species using the average K2P distance and the  
460 species-specific neutral mutation rates. The phylogenetic tree was built based on Foley et al. (2022) and  
461 Amador et al. (2018), and used a combination of non-conflicting average or median divergence estimates  
462 from TimeTree (Table S10) (Kumar, et al. 2022), accessed 3 September 2021.

## 463 **2.2 Orthologous TE Insertion Searches within Mammalia**

464 To identify possible orthologous copies of putative HTTs, we performed pairwise orthologous site  
465 searches between twenty-eight bats species and two mammal outgroups, *Bos taurus* and *Equus caballus*,  
466 using Zoonomia's 241 mammal genome alignment (Genereux, et al. 2020). With the exception of  
467 *Noctilio leporinus*, the other eight bat species not present in the genome alignment were represented by  
468 other members in the same family, if not the same genus. For each of the twenty-eight bat species, we  
469 generated a BED file of the coordinates of each copy of a putative HTT in the final dataset from 2.1 with  
470 50 bp flanking sequence on either end. We then identified the orthologous sections of the outgroup  
471 genomes with the utility hallLiftover, and merged all close ( $\leq 2$  bp) coordinate hits for the same TE copy  
472 into a single hit using BEDTools sort and mergeBed (Quinlan and Hall 2010). We then performed a series  
473 of TE annotations for all orthologous sites in the target outgroup species, first using RepeatMasker (Smit,  
474 et al. 2013-2015) with a combined mammalian TE consensus library of ancestral mammal repeats from  
475 the Dfam database v.3.6 (Storer, Hubley, Rosen, Wheeler, et al. 2021) and our original library from  
476 section 1.2. Any annotations matching one of the 221 putative HTTs were then subjected to an additional  
477 annotation and alignment with the cross\_match utility (Gordon 2003). Any cross\_match annotations  
478 matching one of the 221 putative HTTs were then manually checked for 1) TE identity match to the copy  
479 at the bat site, 2) alignment size and score, and 3) site alignment to bat species (e.g. were there large  
480 (>1000 bp) gaps). The same process of pairwise orthologous site searches was performed with  
481 representative species for mammal groups harboring any of putative HTTs, which included *Microgale*  
482 *talazaci* (Afrosoricida), *Tupaia chinensis* (Scandentia), *Nycticebus coucang* (Lemuriformes), *Crociodura*  
483 *indochinensis* (Eulipotyphla). These mammals were paired with representative bat species: *Hipposideros*  
484 *galeritus*, *Myotis myotis*, *Murina fuae*, and/or *Pipistrellus pipistrellus*. We also performed orthologous

485 site searches between representatives of the two bat suborders: Yinpterochiroptera (*Craseonycteris*  
486 *thonglongyai*, *Hipposideros galeritus*) and Yangochiroptera (*Myotis myotis*, *Pipistrellus pipistrellus*).

### 487 **2.3 Identification of Putative Horizontally Transferred TEs Outside of Mammalia**

488 After identifying HT events, we applied the above methodology to identify possible HT events between  
489 Chiroptera and non-mammal eukaryotes. We performed blastn searches of the eukaryotic reference  
490 genome database (accessed 6 April 2021 (Camacho, et al. 2009)), excluding mammals, using the  
491 consensus sequences from the putative chiropteran HTTs as our query input. To reduce false negatives in  
492 distantly related taxa, we used the criterion of  $\geq 90$  full-length or near full-length copies for non-  
493 autonomous elements, and a lower threshold of  $\geq 50$  copies for autonomous elements. As non-autonomous  
494 copies tend to make up the majority of DNA transposon insertions (Lohe, et al. 1995; Feschotte and  
495 Pritham 2007; Muñoz-López and García-Pérez 2010), this threshold is more likely to detect true  
496 evolutionarily recent HTT in more distantly related organisms. To identify autonomous elements, we  
497 searched for open reading frames (ORFs) via the getorf utility of EMBOSS v6.6.0 (Rice, et al. 2000) in  
498 species-specific consensus sequences of the putative HTT generated from a custom script,  
499 `extend_align.sh`, which is available on Github ([https://github.com/davidaray/bioinfo\\_tools](https://github.com/davidaray/bioinfo_tools)). We identified  
500 transposase ORFs by performing blastx searches.

### 501 **2.3 Testing for Associations with Species Richness**

502 Two sets of analyses were conducted. First, we tested the association between horizontally transferred  
503 TEs and fraction species richness modelling both these variables with errors. Then, we modelled fraction  
504 species richness as a function of cumulative young ( $\leq 50$  My) TEs (see Supplemental Methods for details).

505

## 506 **References**

- 507 Amador LI, Moyers Arévalo RL, Almeida FC, Catalano SA, Giannini NP. 2018. Bat Systematics in the  
508 Light of Unconstrained Analyses of a Comprehensive Molecular Supermatrix. *Journal of Mammalian*  
509 *Evolution* 25:37-70.
- 510 Arbour JH, Curtis AA, Santana SE. 2019. Signatures of echolocation and dietary ecology in the adaptive  
511 evolution of skull shape in bats. *Nature Communications* 10:2036.
- 512 Boissinot S, Sookdeo A. 2016. The Evolution of LINE-1 in Vertebrates. *Genome Biology and Evolution*  
513 8:3485-3507.

514 Brook CE, Boots M, Chandran K, Dobson AP, Drosten C, Graham AL, Grenfell BT, Müller MA, Ng M,  
515 Wang LF, et al. 2020. Accelerated viral dynamics in bat cell lines, with implications for zoonotic  
516 emergence. *Elife* 9.

517 Camacho C, Coulouris G, Avagyan V, Ma N, Papadopoulos J, Bealer K, Madden TL. 2009. BLAST+:  
518 architecture and applications. *BMC Bioinformatics* 10:421.

519 Cantrell MA, Scott L, Brown CJ, Martinez AR, Wichman HA. 2008. Loss of LINE-1 activity in the  
520 megabats. *Genetics* 178:393-404.

521 Casacuberta E, González J. 2013. The impact of transposable elements in environmental adaptation.  
522 *Molecular Ecology* 22:1503-1517.

523 Chalopin D, Naville M, Plard F, Galiana D, Volff J-N. 2015. Comparative Analysis of Transposable  
524 Elements Highlights Mobilome Diversity and Evolution in Vertebrates. *Genome Biology and Evolution*  
525 7:567-580.

526 Christmas MJ, Kaplow IM, Genereux DP, Dong MX, Hughes GM, Li X, Sullivan PF, Hindle AG,  
527 Andrews G, Armstrong JC, et al. forthcoming. Evolutionary constraint and innovation across hundreds of  
528 placental mammals. *Science*.

529 Chuong EB, Rumi MA, Soares MJ, Baker JC. 2013. Endogenous retroviruses function as species-specific  
530 enhancer elements in the placenta. *Nat Genet* 45:325-329.

531 Cordaux R, Batzer MA. 2009. The impact of retrotransposons on human genome evolution. *Nature*  
532 *Reviews Genetics* 10:691-703.

533 Cordaux R, Udit S, Batzer MA, Feschotte C. 2006. Birth of a chimeric primate gene by capture of the  
534 transposase gene from a mobile element. *Proc Natl Acad Sci U S A* 103:8101-8106.

535 Cosby RL, Judd J, Zhang R, Zhong A, Garry N, Pritham EJ, Feschotte C. 2021. Recurrent evolution of  
536 vertebrate transcription factors by transposase capture. *Science* 371:eabc6405.

537 Csorba G, Ujhelyi P, Thomas N. 2003. Horseshoe bats of the world:(Chiroptera: Rhinolophidae): Alana  
538 books.

539 Demos TC, Webala PW, Goodman SM, Kerbis Peterhans JC, Bartonjo M, Patterson BD. 2019. Molecular  
540 phylogenetics of the African horseshoe bats (Chiroptera: Rhinolophidae): expanded geographic and  
541 taxonomic sampling of the Afrotropics. *BMC Evol Biol* 19:166.

542 El Baidouri M, Carpentier M-C, Cooke R, Gao D, Lasserre E, Llauro C, Mirouze M, Picault N, Jackson  
543 SA, Panaud O. 2014. Widespread and frequent horizontal transfers of transposable elements in plants.  
544 *Genome Research* 24:831-838.

545 Fenton MB, Bogdanowicz W. 2002. Relationships between external morphology and foraging behaviour:  
546 bats in the genus *Myotis*. *Canadian Journal of Zoology* 80:1004-1013.

547 Feschotte C. 2008. Transposable elements and the evolution of regulatory networks. *Nat Rev Genet*  
548 9:397-405.

549 Feschotte C, Pritham EJ. 2007. DNA transposons and the evolution of eukaryotic genomes. *Annu Rev*  
550 *Genet* 41:331-368.

551 Foley NM, Hughes GM, Huang Z, Clarke M, Jebb D, Whelan CV, Petit EJ, Touzalin F, Farcy O, Jones  
552 G, et al. 2018. Growing old, yet staying young: The role of telomeres in bats' exceptional longevity. *Sci*  
553 *Adv* 4:eaa0926.

554 Foley NM, Mason VC, Harris AJ, Bredemeyer KR, Damas J, Lewin HA, Eizirik E, Gatesy J, Springer  
555 MS, Murphy WJ. 2022. A genomic timescale for placental mammal evolution.  
556 [bioRxiv:2022.2008.2010.503388](https://doi.org/10.1101/2022.08.20.503388).

557 Foley NM, Thong VD, Soisook P, Goodman SM, Armstrong KN, Jacobs DS, Puechmaille SJ, Teeling  
558 EC. 2015. How and Why Overcome the Impediments to Resolution: Lessons from rhinolophid and  
559 hipposiderid Bats. *Molecular Biology and Evolution* 32:313-333.

560 Furano AV, Duvernell DD, Boissinot S. 2004. L1 (LINE-1) retrotransposon diversity differs dramatically  
561 between mammals and fish. *Trends in Genetics* 20:9-14.

562 Genereux DP, Serres A, Armstrong J, Johnson J, Marinescu VD, Murén E, Juan D, Bejerano G, Casewell  
563 NR, Chemnick LG, et al. 2020. A comparative genomics multitool for scientific discovery and  
564 conservation. *Nature* 587:240-245.

565 Gilbert C, Chateigner A, Ernenwein L, Barbe V, Bézier A, Herniou EA, Cordaux R. 2014. Population  
566 genomics supports baculoviruses as vectors of horizontal transfer of insect transposons. *Nature*  
567 *Communications* 5:3348.

568 Gilbert C, Feschotte C. 2018. Horizontal acquisition of transposable elements and viral sequences:  
569 patterns and consequences. *Current Opinion in Genetics & Development* 49:15-24.

570 Gilbert C, Peccoud J, Chateigner A, Moumen B, Cordaux R, Herniou EA. 2016. Continuous Influx of  
571 Genetic Material from Host to Virus Populations. *PLOS Genetics* 12:e1005838.

572 Gilbert C, Schaack S, Pace Ii JK, Brindley PJ, Feschotte C. 2010. A role for host–parasite interactions in  
573 the horizontal transfer of transposons across phyla. *Nature* 464:1347-1350.

574 Gordon D. 2003. Viewing and editing assembled sequences using Consed. *Curr Protoc Bioinformatics*  
575 Chapter 11:Unit11.12.

576 Grabundzija I, Messing SA, Thomas J, Cosby RL, Bilic I, Miskey C, Gogol-Döring A, Kapitonov V,  
577 Diem T, Dalda A, et al. 2016. A Helitron transposon reconstructed from bats reveals a novel mechanism  
578 of genome shuffling in eukaryotes. *Nat Commun* 7:10716.

579 Huang Z, Whelan CV, Foley NM, Jebb D, Touzalin F, Petit EJ, Puechmaille SJ, Teeling EC. 2019.  
580 Longitudinal comparative transcriptomics reveals unique mechanisms underlying extended healthspan in  
581 bats. *Nature Ecology & Evolution* 3:1110-1120.

582 Hunter JD. 2007. Matplotlib: A 2D Graphics Environment. *Computing in Science & Engineering* 9:90-  
583 95.

584 Irving AT, Ahn M, Goh G, Anderson DE, Wang LF. 2021. Lessons from the host defences of bats, a  
585 unique viral reservoir. *Nature* 589:363-370.

586 Jacques P, Jeyakani J, Bourque G. 2013. The majority of primate-specific regulatory sequences are  
587 derived from transposable elements. *PLoS Genet* 9:e1003504.

588 Jebb D, Huang Z, Pippel M, Hughes GM, Lavrichenko K, Devanna P, Winkler S, Jermiin LS, Skirmuntt  
589 EC, Katzourakis A, et al. 2019. Six new reference-quality bat genomes illuminate the molecular basis and  
590 evolution of bat adaptations. *bioRxiv*:836874.

591 Jebb D, Huang Z, Pippel M, Hughes GM, Lavrichenko K, Devanna P, Winkler S, Jermiin LS, Skirmuntt  
592 EC, Katzourakis A, et al. 2020. Six reference-quality genomes reveal evolution of bat adaptations. *Nature*  
593 583:578-584.

594 Judd J, Sanderson H, Feschotte C. 2021. Evolution of mouse circadian enhancers from transposable  
595 elements. *Genome Biology* 22:193.

596 Kofler R, Senti K-A, Nolte V, Tobler R, Schlötterer C. 2018. Molecular dissection of a natural  
597 transposable element invasion. *Genome Research* 28:824-835.

598 Konkel MK, Walker JA, Batzer MA. 2010. LINEs and SINEs of primate evolution. *Evolutionary*  
599 *anthropology* 19:236-249.

600 Kordis D, Gubensek F. 1998. Unusual horizontal transfer of a long interspersed nuclear element between  
601 distant vertebrate classes. *Proc Natl Acad Sci U S A* 95:10704-10709.

602 Kumar S, Suleski M, Craig JM, Kasprowitz AE, Sanderford M, Li M, Stecher G, Hedges SB. 2022.  
603 TimeTree 5: An Expanded Resource for Species Divergence Times. *Molecular Biology and Evolution*  
604 39:msac174.

605 Kunarso G, Chia NY, Jeyakani J, Hwang C, Lu X, Chan YS, Ng HH, Bourque G. 2010. Transposable  
606 elements have rewired the core regulatory network of human embryonic stem cells. *Nature Genetics*  
607 42:631-634.

608 Lack JB, Van Den Bussche RA. 2010. Identifying the confounding factors in resolving phylogenetic  
609 relationships in Vespertilionidae. *Journal of Mammalogy* 91:1435-1448.

610 Lampe DJ, Churchill ME, Robertson HM. 1996. A purified mariner transposase is sufficient to mediate  
611 transposition in vitro. *The EMBO Journal* 15:5470-5479.

612 Lohe AR, Moriyama EN, Lidholm DA, Hartl DL. 1995. Horizontal transmission, vertical inactivation,  
613 and stochastic loss of mariner-like transposable elements. *Molecular Biology and Evolution* 12:62-72.

614 Matthews S, Rao VS, Durvasula RV. 2011. Modeling horizontal gene transfer (HGT) in the gut of the  
615 Chagas disease vector *Rhodnius prolixus*. *Parasites & Vectors* 4:77.



616 Melo ESd, Wallau GL. 2020. Mosquito genomes are frequently invaded by transposable elements  
617 through horizontal transfer. *PLOS Genetics* 16:e1008946.

618 Mitra R, Li X, Kapusta A, Mayhew D, Mitra RD, Feschotte C, Craig NL. 2013. Functional  
619 characterization of piggyBat from the bat *Myotis lucifugus* unveils an active mammalian DNA  
620 transposon. *Proc Natl Acad Sci U S A* 110:234-239.

621 Mora C, Tittensor DP, Adl S, Simpson AGB, Worm B. 2011. How Many Species Are There on Earth and  
622 in the Ocean? *PLOS Biology* 9:e1001127.

623 Morales AE, Ruedi M, Field K, Carstens BC. 2019. Diversification rates have no effect on the convergent  
624 evolution of foraging strategies in the most speciose genus of bats, *Myotis*\*. *Evolution* 73:2263-2280.

625 Moreno Santillán DD, Lama TM, Gutierrez Guerrero YT, Brown AM, Donat P, Zhao H, Rossiter SJ,  
626 Yohe LR, Potter JH, Teeling EC, et al. 2021. Large-scale genome sampling reveals unique immunity and  
627 metabolic adaptations in bats. *Molecular Ecology* n/a.

628 Muñoz-López M, García-Pérez JL. 2010. DNA transposons: nature and applications in genomics. *Current*  
629 *genomics* 11:115-128.

630 Newman JC, Bailey AD, Fan HY, Pavelitz T, Weiner AM. 2008. An abundant evolutionarily conserved  
631 CSB-PiggyBac fusion protein expressed in Cockayne syndrome. *PLoS Genet* 4:e1000031.

632 Nikaido M, Kondo S, Zhang Z, Wu J, Nishihara H, Niimura Y, Suzuki S, Touhara K, Suzuki Y, Noguchi  
633 H, et al. 2020. Comparative genomic analyses illuminate the distinct evolution of megabats within  
634 Chiroptera. *DNA Res* 27.

635 Notwell JH, Chung T, Heavner W, Bejerano G. 2015. A family of transposable elements co-opted into  
636 developmental enhancers in the mouse neocortex. *Nat Commun* 6:6644.

637 Novick P, Smith J, Ray D, Boissinot S. 2010. Independent and parallel lateral transfer of DNA  
638 transposons in tetrapod genomes. *Gene* 449:85-94.

639 Nowak RM. 1999. Walker's mammals of the world. Baltimore, Maryland: John Hopkins University Press.

640 Oliveira SG, Bao W, Martins C, Jurka J. 2012. Horizontal transfers of Mariner transposons between  
641 mammals and insects. *Mob DNA* 3:14.

- 642 Oliver KR, Greene WK. 2011. Mobile DNA and the TE-Thrust hypothesis: supporting evidence from the  
643 primates. *Mob DNA* 2:8.
- 644 Oliver KR, Greene WK. 2012. Transposable elements and viruses as factors in adaptation and evolution:  
645 an expansion and strengthening of the TE-Thrust hypothesis. *Ecol Evol* 2:2912-2933.
- 646 Osmanski AB, Paulat NS, Korstian J, Grimshaw JR, Halsey M, Sullivan KAM, Moreno-Santillán DD,  
647 Crookshanks C, Roberts J, Garcia C, et al. 2022. Insights into mammalian TE diversity via the curation of  
648 248 mammalian genome assemblies. *bioRxiv:2022.2012.2028.522108*.
- 649 Pace JK, 2nd, Gilbert C, Clark MS, Feschotte C. 2008. Repeated horizontal transfer of a DNA transposon  
650 in mammals and other tetrapods. *Proceedings of the National Academy of Sciences of the United States*  
651 *of America* 105:17023-17028.
- 652 Pace JK, Feschotte C. 2007. The evolutionary history of human DNA transposons: evidence for intense  
653 activity in the primate lineage. *Genome Res* 17:422-432.
- 654 Pagan HJ, Smith JD, Hubley RM, Ray DA. 2010. PiggyBac-ing on a primate genome: novel elements,  
655 recent activity and horizontal transfer. *Genome Biol Evol* 2:293-303.
- 656 Pagán HJ, Macas J, Novák P, McCulloch ES, Stevens RD, Ray DA. 2012. Survey sequencing reveals  
657 elevated DNA transposon activity, novel elements, and variation in repetitive landscapes among vesper  
658 bats. *Genome Biol Evol* 4:575-585.
- 659 Palazzo A, Lorusso P, Miskey C, Walisko O, Gerbino A, Marobbio CMT, Ivics Z, Marsano RM. 2019.  
660 Transcriptionally promiscuous “blurry” promoters in Tc1/mariner transposons allow transcription in  
661 distantly related genomes. *Mobile DNA* 10:13.
- 662 Pavey CR. 2021. Comparative echolocation and foraging ecology of horseshoe bats (Rhinolophidae) and  
663 Old World leaf-nosed bats (Hipposideridae) [1](#). *Australian Journal*  
664 *of Zoology*.
- 665 Peccoud J, Loiseau V, Cordaux R, Gilbert C. 2017. Massive horizontal transfer of transposable elements  
666 in insects. *Proceedings of the National Academy of Sciences* 114:4721.

- 667 Platt RN, Mangum SF, Ray DA. 2016. Pinpointing the vesper bat transposon revolution using the  
668 *Miniopterus natalensis* genome. *Mob DNA* 7:12.
- 669 Platt RN, Vandewege MW, Ray DA. 2018. Mammalian transposable elements and their impacts on  
670 genome evolution. *Chromosome Research* 26:25-43.
- 671 Pritham EJ, Feschotte C. 2007. Massive amplification of rolling-circle transposons in the lineage of the  
672 bat *Myotis lucifugus*. *Proc Natl Acad Sci U S A* 104:1895-1900.
- 673 Quinlan AR, Hall IM. 2010. BEDTools: a flexible suite of utilities for comparing genomic features.  
674 *Bioinformatics* 26:841-842.
- 675 Ray DA, Feschotte C, Pagan HJ, Smith JD, Pritham EJ, Arensburger P, Atkinson PW, Craig NL. 2008.  
676 Multiple waves of recent DNA transposon activity in the bat, *Myotis lucifugus*. *Genome Res* 18:717-728.
- 677 Ray DA, Pagan HJ, Platt RN, 2nd, Kroll AR, Schaack S, Stevens RD. 2015. Differential SINE evolution  
678 in vesper and non-vesper bats. *Mobile DNA* 6:10-10.
- 679 Ray DA, Pagan HJ, Thompson ML, Stevens RD. 2007. Bats with hATs: evidence for recent DNA  
680 transposon activity in genus *Myotis*. *Mol Biol Evol* 24:632-639.
- 681 Reiss D, Mialdea G, Miele V, de Vienne DM, Peccoud J, Gilbert C, Duret L, Charlat S. 2019. Global  
682 survey of mobile DNA horizontal transfer in arthropods reveals Lepidoptera as a prime hotspot. *PLOS*  
683 *Genetics* 15:e1007965.
- 684 Rhie A, McCarthy SA, Fedrigo O, Damas J, Formenti G, Koren S, Uliano-Silva M, Chow W,  
685 Fungtammasan A, Kim J, et al. 2021. Towards complete and error-free genome assemblies of all  
686 vertebrate species. *Nature* 592:737-746.
- 687 Rice P, Longden I, Bleasby A. 2000. EMBOSS: the European Molecular Biology Open Software Suite.  
688 *Trends Genet* 16:276-277.
- 689 Schaack S, Gilbert C, Feschotte C. 2010. Promiscuous DNA: horizontal transfer of transposable elements  
690 and why it matters for eukaryotic evolution. *Trends in Ecology & Evolution* 25:537-546.

691 Schmidt D, Schwalie PC, Wilson MD, Ballester B, Gonçalves A, Kutter C, Brown GD, Marshall A,  
692 Flicek P, Odom DT. 2012. Waves of retrotransposon expansion remodel genome organization and CTCF  
693 binding in multiple mammalian lineages. *Cell* 148:335-348.

694 Seim I, Fang X, Xiong Z, Lobanov AV, Huang Z, Ma S, Feng Y, Turanov AA, Zhu Y, Lenz TL, et al.  
695 2013. Genome analysis reveals insights into physiology and longevity of the Brandt's bat *Myotis brandtii*.  
696 *Nat Commun* 4:2212.

697 Silva JC, Loreto EL, Clark JB. 2004. Factors that affect the horizontal transfer of transposable elements.  
698 *Curr Issues Mol Biol* 6:57-71.

699 Bat Species of the World: A taxonomic and geographic database [Internet]. 2020. cited 02/12/2021].  
700 Available from <https://batnames.org/>.

701 Smit AFA. 1996. The origin of interspersed repeats in the human genome. *Current Opinion in Genetics &*  
702 *Development* 6:743-748.

703 Smit AFA, Hubley R, Green P. 2013-2015. RepeatMasker Open-4.0. Version 4.0.9.

704 Sotero-Caio CG, Platt RN, II, Suh A, Ray DA. 2017. Evolution and Diversity of Transposable Elements  
705 in Vertebrate Genomes. *Genome Biology and Evolution* 9:161-177.

706 Stoffberg S, Jacobs DS, Mackie IJ, Matthee CA. 2010. Molecular phylogenetics and historical  
707 biogeography of *Rhinolophus* bats. *Mol Phylogenet Evol* 54:1-9.

708 Storer J, Hubley R, Rosen J, Wheeler TJ, Smit AF. 2021. The Dfam community resource of transposable  
709 element families, sequence models, and genome annotations. *Mobile DNA* 12:2.

710 Storer JM, Hubley R, Rosen J, Smit AFA. 2021. Curation Guidelines for de novo Generated Transposable  
711 Element Families. *Curr Protoc* 1:e154.

712 Subudhi S, Rapin N, Misra V. 2019. Immune System Modulation and Viral Persistence in Bats:  
713 Understanding Viral Spillover. *Viruses* 11.

714 Sundaram V, Cheng Y, Ma Z, Li D, Xing X, Edge P, Snyder MP, Wang T. 2014. Widespread  
715 contribution of transposable elements to the innovation of gene regulatory networks. *Genome Res*  
716 24:1963-1976.

- 717 Teeling EC, Springer MS, Madsen O, Bates P, O'Brien SJ, Murphy WJ. 2005. A Molecular Phylogeny for  
718 Bats Illuminates Biogeography and the Fossil Record. *Science* 307:580-584.
- 719 Teeling EC, Vernes SC, Dávalos LM, Ray DA, Gilbert MTP, Myers E. 2018. Bat Biology, Genomes, and  
720 the Bat1K Project: To Generate Chromosome-Level Genomes for All Living Bat Species. *Annual Review*  
721 *of Animal Biosciences* 6:23-46.
- 722 Thomas J, Phillips CD, Baker RJ, Pritham EJ. 2014. Rolling-circle transposons catalyze genomic  
723 innovation in a mammalian lineage. *Genome Biol Evol* 6:2595-2610.
- 724 Thomas J, Schaack S, Pritham EJ. 2010. Pervasive horizontal transfer of rolling-circle transposons among  
725 animals. *Genome Biol Evol* 2:656-664.
- 726 Thomas J, Sorourian M, Ray D, Baker RJ, Pritham EJ. 2011. The limited distribution of Helitrons to  
727 vesper bats supports horizontal transfer. *Gene* 474:52-58.
- 728 Threlfall J, Blaxter M. 2021. Launching the Tree of Life Gateway [version 1; peer review: not peer  
729 reviewed]. *Wellcome Open Research* 6.
- 730 Tipney HJ, Hinsley TA, Brass A, Metcalfe K, Donnai D, Tassabehji M. 2004. Isolation and  
731 characterisation of GTF2IRD2, a novel fusion gene and member of the TFII-I family of transcription  
732 factors, deleted in Williams-Beuren syndrome. *Eur J Hum Genet* 12:551-560.
- 733 Trizzino M, Park Y, Holsbach-Beltrame M, Aracena K, Mika K, Caliskan M, Perry GH, Lynch VJ,  
734 Brown CD. 2017. Transposable elements are the primary source of novelty in primate gene regulation.  
735 *Genome Res* 27:1623-1633.
- 736 Wallau GL, Ortiz MF, Loreto ELS. 2012. Horizontal Transposon Transfer in Eukarya: Detection, Bias,  
737 and Perspectives. *Genome Biology and Evolution* 4:801-811.
- 738 Wang K, Tian S, Galindo-González J, Dávalos LM, Zhang Y, Zhao H. 2020. Molecular adaptation and  
739 convergent evolution of frugivory in Old World and neotropical fruit bats. *Molecular Ecology* 29:4366-  
740 4381.

- 741 Wang T, Zeng J, Lowe CB, Sellers RG, Salama SR, Yang M, Burgess SM, Brachmann RK, Haussler D.  
742 2007. Species-specific endogenous retroviruses shape the transcriptional network of the human tumor  
743 suppressor protein p53. *Proc Natl Acad Sci U S A* 104:18613-18618.
- 744 Wells JN, Feschotte C. 2020. A Field Guide to Eukaryotic Transposable Elements. *Annual review of*  
745 *genetics* 54:539-561.
- 746 Wicker T, Sabot F, Hua-Van A, Bennetzen JL, Capy P, Chalhoub B, Flavell A, Leroy P, Morgante M,  
747 Panaud O, et al. 2007. A unified classification system for eukaryotic transposable elements. *Nat Rev*  
748 *Genet* 8:973-982.
- 749 Zhang G, Cowled C, Shi Z, Huang Z, Bishop-Lilly KA, Fang X, Wynne JW, Xiong Z, Baker ML, Zhao  
750 W, et al. 2013. Comparative analysis of bat genomes provides insight into the evolution of flight and  
751 immunity. *Science* 339:456-460.
- 752 Zhang H-H, Peccoud J, Xu M-R-X, Zhang X-G, Gilbert C. 2020. Horizontal transfer and evolution of  
753 transposable elements in vertebrates. *Nature Communications* 11:1362.
- 754 Zhang Y, Cheng TC, Huang G, Lu Q, Surleac MD, Mandell JD, Pontarotti P, Petrescu AJ, Xu A, Xiong  
755 Y, et al. 2019. Transposon molecular domestication and the evolution of the RAG recombinase. *Nature*  
756 569:79-84.
- 757 Zhuo X, Rho M, Feschotte C. 2013. Genome-wide characterization of endogenous retroviruses in the bat  
758 *Myotis lucifugus* reveals recent and diverse infections. *J Virol* 87:8493-8501.

759 **Acknowledgements:**

760 This project was supported by the National Science Foundation (grant numbers DEB 1838283 and IOS  
761 2032006 to D.D.M.S. and D.A.R., DEB 1838273 and DGE 1633299 to L.M.D.); and National Institutes  
762 of Health (grant numbers R01HG002939 and U24HG010136 to J.M.S., R.H., A.S., Jeb R.), NHGRI  
763 R01HG008742 to Z.C.); and the Irish Research Council (grant number IRCLA/2017/58 to E.C.T.); and  
764 the Science Foundation Ireland (grant number 19/FFP/6790 to E.C.T.); and Max Planck Research Group  
765 awarded by the Max Planck Gesellschaft to S.C.V.; and Human Frontiers Science Program (grant number  
766 RGP0058/2016 to S.C.V.); and UK Research and Innovation (grant number MR/T021985/1 to S.C.V.);  
767 and the Swedish Research Council Distinguished Professor Award to K.L.T. The High-Performance

768 Computing Center at Texas Tech University and the SeaWulf computing system at Stony Brook  
769 University provided computational infrastructure throughout the work.

770 **Author contributions:**

771 N.S.P. and D.A.R. contributed to conceptualization, design, data analysis and interpretation, and drafted  
772 the manuscript. N.S.P., J.M.S., A.B.O., K.A.M.S., J.K., J.R.G., M.H., C.G., C.C., J.R., JebR., R.H., A.S.,  
773 and D.A.R. participated in library validation and curation. Genome assembly was accomplished by M.P.,  
774 T. B., and M.H. Methods and interpretation were contributed by N.S.P., J.M.S., A.B.O., D.A.R., L.M.D.,  
775 D.R., K.L-T., E.K.K. and D.D.M.S. All authors contributed to review and editing of the final manuscript.  
776 All authors gave final approval and agreed to be accountable for all aspects of the work.

777 **Conflict of Interest Statement:** The authors declare no potential conflicts of interest with respect to the  
778 authorship and/or publication of this article.

779 **Data Availability Statement:** All assemblies are available on Genbank (see ST1 for accession numbers).  
780 TE consensus sequences, and their seed alignments, are available via the Dfam database. All other data is  
781 available in the supplementary materials; code used in the analysis is available at:  
782 [github.com/daray/bat\\_ht](https://github.com/daray/bat_ht).
